# Supplementary material
Source: Springer Nature journal article supplement (https://www.springermedizin.de/resource/supplementary/12885_2013_4176_MOESM5_ESM.pdf/9465660)

A)

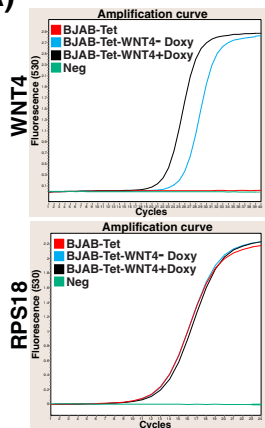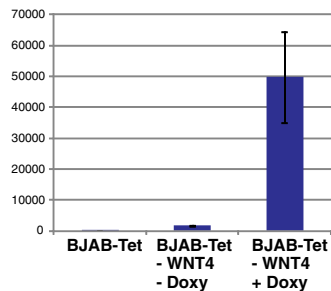

Relative expression:

| BJAB-Tet | BJAB-Tet-WNT4 - Doxy | BJAB-Tet-WNT4 + Doxy |
|----------|----------------------|----------------------|
| 1        | $1.77 \times 10^3$   | $49.75 \times 10^3$  |

B)

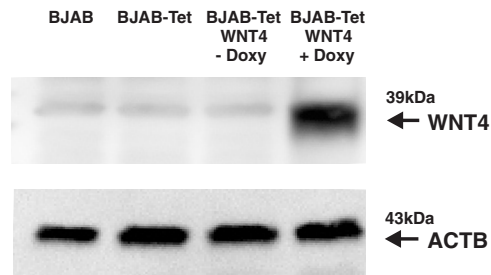

C)

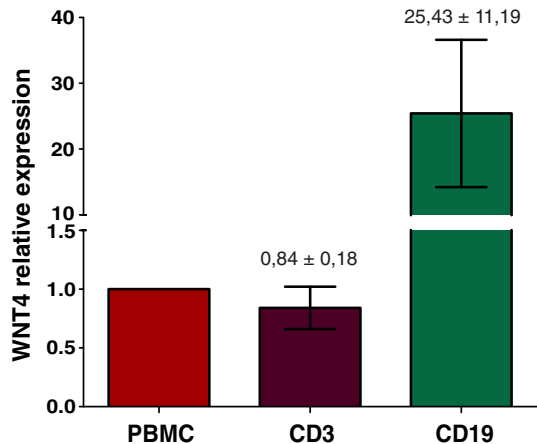

D)

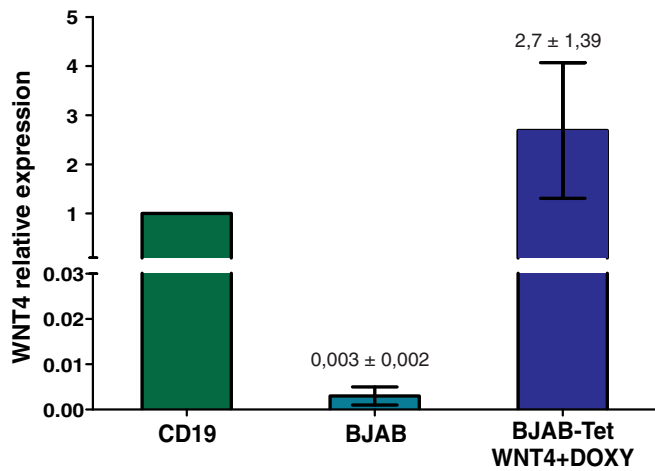

Supplement: MOESM5 [file 9465660]
